# Supplementary material for: Enhancement of mechanical and electrical properties of continuous-fiber-reinforced epoxy composites with stacked graphene
Source: publisher site journal article supplement (doi:10.3762/bjnano.8.191), 2017-09-12
Supplement: Additional file 1 [file 2190-4286-8-191-S1.pdf]

## **Supporting Information**

for

### **Enhancement of mechanical and electrical properties of continuous-fiber-reinforced epoxy composites with stacked graphene**

Naum Naveh\*<sup>1,2</sup>, Olga Shepelev<sup>2</sup> and Samuel Kenig<sup>1,2</sup>

Address: <sup>1</sup>Shenkar College of Engineering and Design, 12 Anna Frank St., Ramat Gan 5252626, Israel and <sup>2</sup>Israel Plastics and Rubber Center, Technion City, Haifa 3200004, Israel

Email: Naum Naveh\* - [naumn@shenkar.ac.il](mailto:naumn@shenkar.ac.il)

\* Corresponding author

### **Thermo-mechanical and electrical properties**

**Table S1:** Thermo-mechanical properties of composite materials based on Kevlar fabric.

| SG, wt % | SAA         | Fiber fraction in laminate, wt % | # plies | Electrical resistivity, conductivity |                       | DMA Storage Modulus at temperature (°C), GPa |      |      |      |      | DMA $T_g$ , °C | Flexural 3-point bending |                      |
|----------|-------------|----------------------------------|---------|--------------------------------------|-----------------------|----------------------------------------------|------|------|------|------|----------------|--------------------------|----------------------|
|          |             |                                  |         | Kevlar                               | Surface, $\Omega$ /sq | Volume, S/cm                                 | 25   | 50   | 75   | 100  |                | 120                      | Stress at yield, MPa |
| 0        | —           | 64.7                             | 5       | 5.0e(14)                             | 1.5e(15)              | 10.7                                         | 10.5 | 10.5 | 9.27 | 4.64 | 116.6          | 156                      | 10.2                 |
| 2.1      | —           | 63.8                             | 5       | 1.3e(8)                              | 2.2e(8)               | 9.75                                         | 9.52 | 9.65 | 9.02 | 5.02 | 118.2          | 156                      | 10.9                 |
| 2.1      | Polyol 4200 | 61.1                             | 5       | 6.0e(7)                              | 4.6e(9)               | 9.46                                         | 9.54 | 9.44 | 8.84 | 4.45 | 116.5          | 209                      | 17.5                 |
| 2.1      | X-100       | 62.0                             | 5       | 5.6e(6)                              | 2.5e(7)               | 12.8                                         | 12.3 | 11.8 | 10.7 | 5.15 | 115.2          | 169                      | 14.4                 |
| 2.1      | X-15        | 60.4                             | 5       | 1.2e(9)                              | 9.0e(9)               | 13.1                                         | 12.8 | 12.2 | 10.6 | 5.0  | 116            | 219                      | 15.8                 |
| 2.1      | GLYMO       | 64.8                             | 5       | 4.0e(5)                              | 5.5e(6)               | 10.8                                         | 10.4 | 9.95 | 8.66 | 4.35 | 116.5          | 145                      | 10.8                 |
| 2.1      | MEMO        | 64.9                             | 5       | 2.0e(7)                              | 3.0e(7)               | 13.0                                         | 12.5 | 11.6 | 9.06 | 4.58 | 116.2          | 168                      | 11.3                 |

**Table S2:** Thermo-mechanical properties of composite materials based on carbon-fabrics.

| SG,<br>wt % | SAA            | Fiber<br>fraction<br>in<br>laminate,<br>wt % | # plies | Electrical resistivity,<br>conductivity |                          | DMA Storage Modulus<br>at temperature (°C), GPa |      |      |      |      | DMA<br>$T_g$ , °C | Flexural 3-point bending |                         |
|-------------|----------------|----------------------------------------------|---------|-----------------------------------------|--------------------------|-------------------------------------------------|------|------|------|------|-------------------|--------------------------|-------------------------|
|             |                |                                              |         | Carbon<br>fabrics                       | Surface,<br>$\Omega$ /sq | Volume,<br>S/cm                                 | 25   | 50   | 75   | 100  |                   | 120                      | Stress at<br>yield, MPa |
| 0           | —              | 56.1                                         | 10      | 9e(6)<br>3.5e(12)                       | 3.4e(5)                  | 39.4                                            | 38.6 | 38.1 | 31.5 | 11.2 | 111.7             | 681                      | 44.5                    |
| 2.1         | —              | 57.9                                         | 10      | 1.1e(4)<br>7.5e(4)                      | 6.5e(5)                  | 42.9                                            | 42.0 | 41.5 | 34.4 | 16.4 | 109.5             | 624                      | 46.0                    |
| 2.1         | Polyol<br>4200 | 59.6                                         | 10      | 1e(4)<br>7e(4)                          | 3.3e(5)                  | 45.7                                            | 44.9 | 44.1 | 39.5 | 20.5 | 111.7             | 690                      | 51.1                    |
| 2.1         | X-100          | 58.7                                         | 10      | 1e(4)<br>2e(5)                          | 1.3e(5)                  | 43.1                                            | 42.6 | 41.7 | 32.7 | 17.3 | 108.3             | 669                      | 50.1                    |
| 2.1         | X-15           | 56.8                                         | 10      | 8.5e(3)<br>2.8e(5)                      | 2.5e(5)                  | 41.1                                            | 40.8 | 40.4 | 37.4 | 14.9 | 113.2             | 672                      | 47.7                    |
| 2.1         | GLYMO          | 58.3                                         | 10      | 1.2e(4)<br>2.3e(5)                      | 1.9e(5)                  | 42.4                                            | 41.6 | 41.3 | 32.7 | 17.1 | 108.9             | 631                      | 49.5                    |
| 2.1         | MEMO           | 58.7                                         | 10      | 1.6e(4)<br>6.3e(4)                      | 2.8e(5)                  | 43.8                                            | 43.2 | 42.4 | 34.1 | 18.0 | 109.2             | 669                      | 48.9                    |

**Table S3:** Thermo-mechanical properties of asymmetric composite materials based on Kevlar/carbon fabrics.

Layering: (0/90 CF)<sub>3</sub>/(0/90 Kev)<sub>3</sub>.

| SG,<br>wt % | SAA            | Fiber<br>fraction<br>in the<br>laminate,<br>wt % | # plies | Electrical resistivity,<br>conductivity |                          | DMA Storage Modulus<br>at temperature (°C), GPa |      |      |      |      | DMA<br>$T_g$ , °C | Flexural 3-point bending |                         |
|-------------|----------------|--------------------------------------------------|---------|-----------------------------------------|--------------------------|-------------------------------------------------|------|------|------|------|-------------------|--------------------------|-------------------------|
|             |                |                                                  |         | Kevlar/<br>Carbon                       | Surface,<br>$\Omega$ /sq | Volume,<br>S/cm                                 | 25   | 50   | 75   | 100  |                   | 120                      | Stress at<br>yield, MPa |
| 0           | —              | 61.0                                             | 3 / 3   | 8e(13)<br>1.5e(5)                       | 6.5e(9)                  | 11.7                                            | 11.4 | 11.7 | 10.8 | 5.02 | 117.1             | 295                      | 15.7                    |
| 2.1         | —              | 57.3                                             | 3 / 3   | 3.5e(8)<br>1.5e(4)                      | 1.0e(9)                  | 11.1                                            | 11.8 | 12.9 | 11.9 | 6.74 | 111.4             | 288                      | 19.1                    |
| 2.1         | Polyol<br>4200 | 59.6                                             | 3 / 3   | 5e(8)<br>4.7e(4)                        | 1.4e(9)                  | 12.3                                            | 12.5 | 13.7 | 12.1 | 6.87 | 108.1             | 311                      | 21.6                    |
| 2.1         | X-100          | 59.9                                             | 3 / 3   | 7.3e(7)<br>6.5e(4)                      | 1.0e(8)                  | 11.2                                            | 11.6 | 12.4 | 11.2 | 5.60 | 112.4             | 283                      | 21.5                    |
| 2.1         | X-15           | 58.9                                             | 3 / 3   | 7.7e(7)<br>5.0e(4)                      | 6.5e(8)                  | 16.1                                            | 15.4 | 15.7 | 14.6 | 9.00 | 112.6             | 289                      | 17.9                    |
| 2.1         | GLYMO          | 57.9                                             | 3 / 3   | 1.5e(7)<br>3.5e(4)                      | 1.1e(8)                  | 11.4                                            | 11.8 | 12.0 | 11.2 | 5.58 | 114.9             | 282                      | 21.4                    |
| 2.1         | MEMO           | 59.5                                             | 3 / 3   | 2.1e(9)<br>6.0e(4)                      | 1.5e(9)                  | 16.2                                            | 16.0 | 15.8 | 13.8 | 7.27 | 115.2             | 302                      | 21.6                    |

**Table S4:** Thermo-mechanical properties of symmetric Kevlar/carbon fabric based composite materials.

Layering: (0/90 CF)<sub>2</sub>/(0/90 Kev)<sub>1</sub>/(0/90 CF)<sub>1</sub>/(0/90 Kev)<sub>1</sub>/(0/90 CF)<sub>2</sub>.

| SG,<br>wt % | SAA            | Fiber<br>fraction<br>in the<br>laminate,<br>wt% | # plies | Electrical resistivity,<br>conductivity |                  | DMA Storage Moduli<br>at temperature (°C), GPa |      |      |      |      | DMA<br><i>T<sub>g</sub></i> , °C | Flexural 3-point<br>bending |                         |
|-------------|----------------|-------------------------------------------------|---------|-----------------------------------------|------------------|------------------------------------------------|------|------|------|------|----------------------------------|-----------------------------|-------------------------|
|             |                |                                                 |         | Kevlar/<br>Carbon                       | Surface,<br>Ω/sq | Volume,<br>S/cm                                | 25   | 50   | 75   | 100  |                                  | 120                         | Stress at<br>yield, MPa |
| 0           | —              | 62.3                                            | 2 / 5   | 2.9e(4)                                 | 5.7e(9)          | 29.2                                           | 29.5 | 31.9 | 31.1 | 17.3 | 115.7                            | 474                         | 38.2                    |
| 2.1         | —              | 61.2                                            | 2 / 5   | 1.3e(4)                                 | 3.0e(8)          | 35.2                                           | 34.8 | 34.4 | 31.5 | 20.2 | 115.9                            | 433                         | 38.8                    |
| 2.1         | Polyol<br>4200 | 58.5                                            | 2 / 5   | 1.3e(4)                                 | 3.2e(7)          | 36.0                                           | 35.5 | 34.8 | 30.3 | 16.6 | 113.5                            | 439                         | 36.3                    |
| 2.1         | X-100          | 57.2                                            | 2 / 5   | 1.5e(4)                                 | 1.4e(7)          | 33.6                                           | 32.7 | 32.4 | 27.6 | 14.0 | 111.6                            | 418                         | 35.6                    |
| 2.1         | X-15           | 57.9                                            | 2 / 5   | 2.7e(4)                                 | 2.6e(6)          | 33.5                                           | 33.2 | 33.1 | 29.8 | 14.6 | 114                              | 401                         | 35.8                    |
| 2.1         | MEMO           | 58.3                                            | 2 / 5   | 3.3e(4)                                 | 3.9e(6)          | 34.5                                           | 33.7 | 33.1 | 30.2 | 17.3 | 113.1                            | 427                         | 37.7                    |

**Table S5:** Thermo-mechanical properties of composite materials based on fiberglass fabrics.

| SG, wt % | SAA type in the matrix blend | Fiber fraction in the laminate, wt % | # plies | Electrical resistivity, conductivity |              | DMA Storage Modulus at temperature, °C, GPa |      |      |      |      | DMA $T_g$ , °C | Flexural 3-point bending |                    |
|----------|------------------------------|--------------------------------------|---------|--------------------------------------|--------------|---------------------------------------------|------|------|------|------|----------------|--------------------------|--------------------|
|          |                              |                                      |         | Surface, $\Omega$ /sq                | Volume, S/cm | 25                                          | 50   | 75   | 100  | 120  |                | Stress at yield, MPa     | Young Modulus, GPa |
| 0        | —                            | 63.7                                 | 10      | 3.5e(14)                             | 2.8e(14)     | 18.6                                        | 17.9 | 16.6 | 13.6 | 6.81 | 112.2          | 562                      | 18.6               |
| 2.1      | —                            | 62.9                                 | 10      | 1.2e(6)                              | 1.5e(6)      | 18.6                                        | 17.8 | 16.6 | 13.8 | 7.08 | 112.1          | 456                      | 18.9               |
| 2.1      | Polyol 4200                  | 63.8                                 | 10      | 3.6e(5)                              | 1.2e(6)      | 18.4                                        | 17.7 | 16.6 | 12.4 | 6.27 | 107.2          | 479                      | 18.7               |
| 2.1      | X-100                        | 62.6                                 | 10      | 1.6e(6)                              | 5.5e(6)      | 19.1                                        | 18.3 | 16.8 | 11.9 | 7.31 | 105.6          | 441                      | 18.2               |
| 2.1      | X-15                         | 61.1                                 | 10      | 5.2e(5)                              | 1.7e(6)      | 16.5                                        | 15.6 | 14.3 | 10.4 | 5.69 | 106.3          | 393                      | 16.9               |
| 2.1      | GLYMO                        | 62.9                                 | 10      | 1.2e(5)                              | 1.7e(6)      | 17.5                                        | 16.5 | 15.2 | 11.4 | 6.53 | 107.7          | 455                      | 17.9               |
| 2.1      | MEMO                         | 64.8                                 | 10      | 3.0e(6)                              | 9.1e(6)      | 18.5                                        | 17.8 | 16.6 | 12.9 | 7.42 | 107.8          | 471                      | 18.7               |

**Table S6:** Thermo-mechanical properties of composite materials based on fiberglass fabrics.

FG modified. Matrix composition: Epoxy DER 331 -100; TETA -14.1; SG 3772 (600 °C for 15 min) – 2.5 pph; SAA – variable.

| SG, wt % | SAA in the matrix blend, type/ % | FG treatment, type/ % | Fiber fraction in the laminate, wt % | # plies | Electrical resistivity, conductivity |              | DMA Storage Modulus at temperature (°C), GPa |      |      |      |      | DMA $T_g$ , °C | Flexural 3-point bending |                    |
|----------|----------------------------------|-----------------------|--------------------------------------|---------|--------------------------------------|--------------|----------------------------------------------|------|------|------|------|----------------|--------------------------|--------------------|
|          |                                  |                       |                                      |         | Surface, $\Omega$ /sq                | Volume, S/cm | 25                                           | 50   | 75   | 100  | 120  |                | Stress at yield, MPa     | Young Modulus, GPa |
| 0        | -                                | -                     | 63.7                                 | 10      | 3.5e(14)                             | 2.8e(14)     | 18.6                                         | 17.9 | 16.6 | 13.6 | 6.81 | 112.2          | 562                      | 18.6               |
| 2.1      | -                                | -                     | 62.9                                 | 10      | 2.5e(6)                              | 1.5e(6)      | 18.6                                         | 17.8 | 16.6 | 13.8 | 7.08 | 112.1          | 456                      | 18.9               |
| 2.1      | MEMO                             | MEMO                  | 62.7                                 | 10      | 4.0e(7)                              | 2.5e(7)      | 17.6                                         | 17.0 | 16.0 | 12.2 | 6.67 | 107.8          |                          |                    |
| 2.1      | X-100                            | GLYMO                 | 64.3                                 | 10      | 6.0e(6)                              | 4.9e(6)      | 17.1                                         | 17.2 | 17.0 | 15.1 | 7.51 | 117.3          |                          |                    |
| 2.1      | -                                | AMEO/ 2               | 60.5                                 | 9       | 1.7e(7)                              | 1.2e(8)      | 15.6                                         | 14.7 | 13.4 | 10.9 | 5.19 | 114.2          | 412                      | 18.6               |
| 2.1      | GLYMO/ 1                         | AMEO/ 2               | 60.2                                 | 9       | 6.2e(6)                              | 2.0e(7)      | 18.5                                         | 17.7 | 16.5 | 14.4 | 6.79 | 114.2          | 553                      | 20.6               |
| 2.1      | X-100/ 1                         | AMEO/ 2               | 59.8                                 | 9       | 3.8e(6)                              | 2.8e(6)      | 16.5                                         | 15.9 | 14.8 | 12.5 | 5.49 | 113.3          | 522                      | 19.3               |
| 2.1      | X-15/ 0.5                        | -                     | 64.4                                 | 10      | 3.5e(7)                              | 5.0e(7)      | 19.1                                         | 18.5 | 17.8 | 15.0 | 6.94 | 112.1          | 600                      | 21.1               |
| 2.1      | -                                | X-15/ 2               | 64.3                                 | 9       | 5.2e(6)                              | 1.8e(7)      | 17.9                                         | 17.3 | 16.7 | 14.5 | 8.03 | 114.1          | 465                      | 19.0               |
| 2.1      | X-15/ 2                          | X-15/ 1               | 63.9                                 | 9       | 3.5e(6)                              | 1.9e(7)      | 19.2                                         | 18.6 | 17.9 | 15.5 | 7.58 | 113.6          | 579                      | 20.3               |
| 2.1      | -                                | X-100/ 2              | 65.0                                 | 9       | 1.1e(6)                              | 1.2e(6)      | 18.7                                         | 18.1 | 17.7 | 15.1 | 7.78 | 113.8          | 564                      | 20.0               |
| 2.1      | X-100/ 0.5                       | X-100/ 1              | 63.1                                 | 9       | 4.0e(7)                              | 4.1e(7)      | 20.1                                         | 19.5 | 18.7 | 15.6 | 7.36 | 113.0          | 553                      | 19.1               |
| 2.1      | X-100/ 1                         | X-100/ 2              | 63.9                                 | 9       | 1.1e(6)                              | 1.2e(6)      | 18.2                                         | 17.5 | 16.3 | 12.6 | 6.83 | 110.1          | 419                      | 18.8               |
| 2.1      | X-100/ 0.5                       | TETA/ 2               | 64.5                                 | 9       | 8.0e(6)                              | 1.2e(7)      | 20.3                                         | 19.7 |      | 17.7 |      | -              | 559                      | 19.4               |

**Table S7:** Effect of FG heat treatment.

| SG, wt% | SAA in the matrix blend, type/% | FG heat treatment at 600°C/2 hrs | FG surface treatment, SAA type/% | DMA Storage Modulus at temperature (°C), GPa |      |      |      |
|---------|---------------------------------|----------------------------------|----------------------------------|----------------------------------------------|------|------|------|
|         |                                 |                                  |                                  | 25                                           | 50   | 75   | 100  |
| 0       | NONE                            | NO                               | NONE                             | 18.6                                         | 17.9 | 16.6 | 13.6 |
| 0       | NONE                            | YES                              | NONE                             | 18.1                                         | 17.5 | 16.9 | 16.3 |
| 2.1     | X-15/0.5                        | NO                               | X-15/1                           | 18.0                                         | 17.3 | 16.5 | 13.6 |
| 2.1     | X-15/0.5                        | YES                              | X-15/1                           | 18.9                                         | 18.2 | 17.5 | 16.8 |
| 2.1     | GLYMO/1                         | NO                               | AMEO/1                           | 17.1                                         | 16.4 | 15.4 | 14.2 |
| 2.1     | GLYMO/1                         | YES                              | AMEO/1                           | 17.7                                         | 17.1 | 16.5 | 15.8 |
| 2.1     | GLYMO/1                         | YES                              | TETA/1                           | 18.9                                         | 18.2 | 17.6 | 17.0 |
